# Supplementary material for: SNP Microarray in FISH Negative Clinically Suspected 22q11.2 Microdeletion Syndrome
Source: Hindawi journal article supplement (doi:10.1155/2016/5826431), 2016-01-01
Supplement: f1 [file 5826431.f1.zip]

## Proforma (22q11.2 microdeletion syndrome)

Name: \_\_\_\_\_ Age: \_\_\_\_\_ Sex: \_\_\_\_\_ DOB: \_\_\_\_\_  
 Father: \_\_\_\_\_  
 Date (history taking): \_\_\_\_\_ CR No.: \_\_\_\_\_ OPD: \_\_\_\_\_  
 Occupation (parents): \_\_\_\_\_ Education (parents): \_\_\_\_\_  
 Address: \_\_\_\_\_  
 Tel: \_\_\_\_\_  
 Email: \_\_\_\_\_

### Pedigree

Referral Diagnosis:

Chief Complaints:

History:

Examination:

General:

Systemic:

Specific:

| Column A                                                                                                                                         | Column B                                                                                                                                             | Column C                                                      |
|--------------------------------------------------------------------------------------------------------------------------------------------------|------------------------------------------------------------------------------------------------------------------------------------------------------|---------------------------------------------------------------|
| <i>The presence of one of the following</i>                                                                                                      | <i>Two or more of the following core features</i>                                                                                                    | <i>One core feature plus one of these associated features</i> |
| Conotruncal cardiac anomaly such as Fallot's tetralogy, interrupted aortic arch, truncus arteriosus or major aorto-pulmonary collateral arteries | Characteristic facial abnormalities viz. broad bulbous nose, square shaped tip of nose, short filtrum, telecanthus, slanting eyes, low set ears, etc | Long slender fingers and hands                                |
| Parent of an affected child                                                                                                                      | Non-conotruncal congenital cardiac defect                                                                                                            | Short stature                                                 |
|                                                                                                                                                  | Learning difficulties/developmental delay                                                                                                            | Hypotonia                                                     |
|                                                                                                                                                  | Cleft palate, velopharyngeal insufficiency or swallowing difficulty                                                                                  | Renal abnormalities or Potter sequence                        |
|                                                                                                                                                  | Hypocalcaemia                                                                                                                                        | Psychiatric (especially bipolar) disorders                    |
|                                                                                                                                                  | Immunodeficiency or thymic hypoplasia                                                                                                                | Family history of congenital cardiac defects                  |

Indications for FISH: Column A (one features); Column B (2 or more features);  
 Column C (one column B + one column C features)
