# Supplementary material for: SNP Microarray in FISH Negative Clinically Suspected 22q11.2 Microdeletion Syndrome
Source: Scientifica (Cairo). 2016 Mar 9;2016:5826431. doi: 10.1155/2016/5826431 (PMC4804090; doi:10.1155/2016/5826431)
Supplement: Supplementary file 1 — Clinical proforma for evaluation of suspected 22q11.2 micro-deletion (also provides useful guideline for clinical diagnosis) Supplementary file 2: Master table of the study showing details of FISH and SNP microarray findings of all 101 FISH negative/non-informative samples [file 5826431.f1.zip]

Archive with 4 entries (2 files):
- 5826431.f1/
- 5826431.f1/New folder (2)/
- 5826431.f1/New folder (2)/6 annexure 1.pdf
- 5826431.f1/New folder (2)/7 master table (annexure 2).xls
